# Supplementary material for: Adherence to MIND Diet, Genetic Susceptibility, and Incident Dementia in Three US Cohorts
Source: MDPI journal article supplement (doi:10.3390/nu14132759), 2022-07-03
Supplement: s1 [file s1]

Figure S1. MIND adherence score distributions by cohort

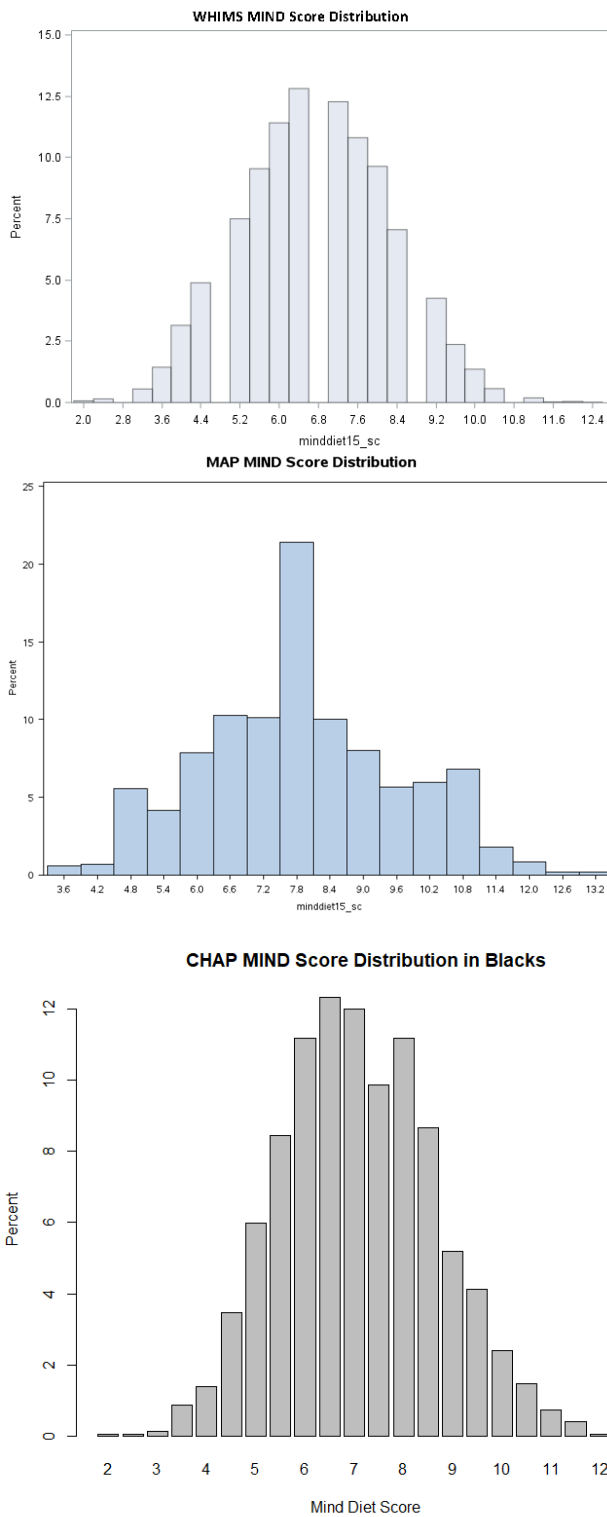

**CHAP MIND Score Distribution in EU**

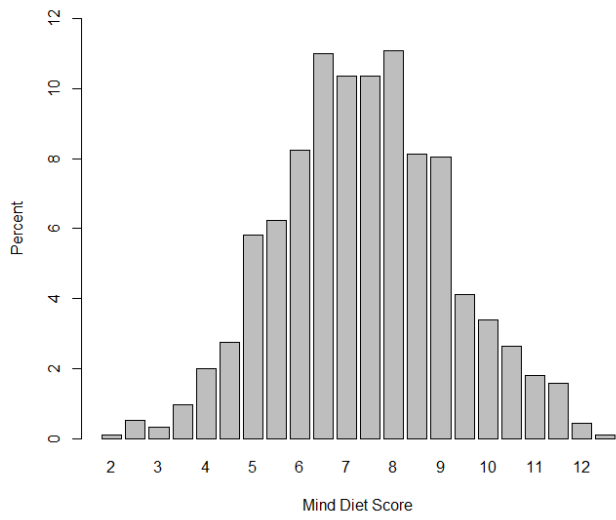

**Table S1. The Mediterranean-DASH Diet Intervention for Neurodegenerative Delay (MIND) Adherence Score Derivation**

| MIND component                                                                                                                                                                                                                                                                                                                                                                                                                                                                                                         | # servings (serving size)* for max point =1 |                                       |                                       |
|------------------------------------------------------------------------------------------------------------------------------------------------------------------------------------------------------------------------------------------------------------------------------------------------------------------------------------------------------------------------------------------------------------------------------------------------------------------------------------------------------------------------|---------------------------------------------|---------------------------------------|---------------------------------------|
|                                                                                                                                                                                                                                                                                                                                                                                                                                                                                                                        | MAP                                         | WHIMS                                 | CHAP                                  |
| Green leafy vegetables                                                                                                                                                                                                                                                                                                                                                                                                                                                                                                 | ≥6 /wk (1/2 - 1 cup)                        | ≥6 /wk (1/2 - 1 cup)                  | ≥6 /wk (1/2 - 1 cup)                  |
| Other vegetables                                                                                                                                                                                                                                                                                                                                                                                                                                                                                                       | ≥1 /d (1/2 cup)                             | ≥1 /d (1/2 cup)                       | ≥1 /d (1/2 cup)                       |
| Nuts (mixed nuts, peanut butter)                                                                                                                                                                                                                                                                                                                                                                                                                                                                                       | ≥5 /wk (1 oz)                               | ≥5 /wk (1 oz)                         | ≥5 /wk (1 oz)                         |
| Berries                                                                                                                                                                                                                                                                                                                                                                                                                                                                                                                | ≥2 /wk (1/2 cup)                            | ≥2 /wk (1/2 cup)                      | ≥2 /wk (1/2 cup)                      |
| Beans/legumes                                                                                                                                                                                                                                                                                                                                                                                                                                                                                                          | >3 /wk (1/2 cup each)                       | >3 /wk (1/2 cup each)                 | >3 /wk (1/2 cup each)                 |
| Whole grains                                                                                                                                                                                                                                                                                                                                                                                                                                                                                                           | ≥3 /d <sup>†</sup>                          | ≥3 /d <sup>†</sup>                    | ≥3 /d <sup>†</sup>                    |
| Fish (not fried)                                                                                                                                                                                                                                                                                                                                                                                                                                                                                                       | ≥1 /wk (3-5 oz)                             | ≥1 /wk (3-5 oz)                       | ≥1 /wk (3-5 oz)                       |
| Poultry (not fried, white meat, skinless)                                                                                                                                                                                                                                                                                                                                                                                                                                                                              | ≥2 /wk (3-5 oz each)                        | ≥2 /wk (3-5 oz each)                  | ≥2 /wk (3-5 oz each)                  |
| Extra virgin olive oil                                                                                                                                                                                                                                                                                                                                                                                                                                                                                                 | Primary cooking oil: Olive/canola oil       | Primary cooking oil: Olive/canola oil | Primary cooking oil: Olive/canola oil |
| Red and processed meats                                                                                                                                                                                                                                                                                                                                                                                                                                                                                                | <4 /wk (3-5 oz each)                        | <4 /wk (3-5 oz each)                  | <4 /wk (3-5 oz each)                  |
| Butter and stick margarine                                                                                                                                                                                                                                                                                                                                                                                                                                                                                             | <1 tsp /d                                   | ≤1 /d (1 pat/tsp)                     | ≤1 pats/d                             |
| Cheese                                                                                                                                                                                                                                                                                                                                                                                                                                                                                                                 | <1 /wk (1 oz)                               | <1 /wk (1 oz)                         | <1 /wk (1 oz)                         |
| Pastries, candy bars, sweets                                                                                                                                                                                                                                                                                                                                                                                                                                                                                           | <5 /wk                                      | <5 /wk                                | <5 /wk                                |
| Fried foods and fast food                                                                                                                                                                                                                                                                                                                                                                                                                                                                                              | <1 /wk (1 meal)                             | <1 /wk (1 meal)                       | ≤1 /wk (1 meal)                       |
| Wine                                                                                                                                                                                                                                                                                                                                                                                                                                                                                                                   | 2-7/wk -1/d (~5 oz)                         | 1 /d (~5 oz)                          | 2-4/wk – 1/d                          |
| <sup>†</sup> MAP: 1 slice dark bread, ½ dark bagel, ½ c brown rice/pastas, wild rice, quinoa, barley, buckwheat, bulgur, farro, kamut, millet, oats, rye, spelt, ¾ c whole grain cereal. WHIMS: cold cereal including: granola; high fiber cold cereal; whole grain cold cereal; and dark bread (bagel/roll/pita/eng muff) CHAP: hot cereal like oatmeal or grits, dark bread, other grains like kasha, couscous or bulgar<br>*Only food item portions resulting in 1 point are shown; 0 or 0.5 points are also given. |                                             |                                       |                                       |

**Table S2. Cognitive Tests Used in Cohorts**

| Test                                                                                     | MAP            | CHAP           | WHIMS          |
|------------------------------------------------------------------------------------------|----------------|----------------|----------------|
| <b>Domain: Episodic Memory</b>                                                           |                |                |                |
| Word list memory                                                                         | X <sup>‡</sup> |                | X*             |
| Word list recall                                                                         | X <sup>‡</sup> |                | X*             |
| Word list recognition                                                                    | X <sup>‡</sup> |                | X*             |
| East Boston story immediate                                                              | X <sup>‡</sup> | X <sup>‡</sup> |                |
| East Boston story delayed                                                                | X <sup>‡</sup> | X <sup>‡</sup> |                |
| Logical Memory Ia immediate                                                              | X <sup>‡</sup> |                |                |
| Logical Memory IIa delayed                                                               | X <sup>‡</sup> |                |                |
| <b>Domain: Semantic Memory</b>                                                           |                |                |                |
| Boston Naming Test                                                                       | X <sup>‡</sup> |                | X*             |
| Verbal fluency                                                                           | X <sup>‡</sup> |                |                |
| Reading test                                                                             | X <sup>‡</sup> |                |                |
| <b>Domain: Working Memory</b>                                                            |                |                |                |
| Digit span forward                                                                       | X <sup>‡</sup> |                |                |
| Digit span backward                                                                      | X <sup>‡</sup> |                |                |
| Digit ordering                                                                           | X <sup>‡</sup> |                |                |
| <b>Domain: Perceptual Speed</b>                                                          |                |                |                |
| Symbol Digit Modalities Test                                                             | X <sup>‡</sup> | X <sup>‡</sup> |                |
| Number comparison                                                                        | X <sup>‡</sup> |                |                |
| Stroop word reading                                                                      | X <sup>‡</sup> |                |                |
| Stroop color naming                                                                      | X <sup>‡</sup> |                |                |
| <b>Domain: Visuospatial Ability</b>                                                      |                |                |                |
| Judgment of line orientation                                                             | X <sup>‡</sup> |                |                |
| Standard progressive matrices                                                            | X <sup>‡</sup> |                |                |
| <b>Domain: Praxis</b>                                                                    |                |                |                |
| Constructional praxis                                                                    |                |                | X*             |
| <b>Domain: Executive Function</b>                                                        |                |                |                |
| Trail Making Test A and B                                                                |                |                | X*             |
| <b>Global Cognitive Function</b>                                                         |                |                |                |
| Mini-Mental State Examination                                                            | X              | X <sup>‡</sup> |                |
| Modified Mini-Mental State Examination                                                   |                |                | X              |
| Modified Telephone Interview for Cognitive Status                                        |                |                | X <sup>‡</sup> |
| *WHIMS (1996-2008): test completed only if participant met specific 3MSE score threshold |                |                |                |
| †WHIMS-ECHO, 2008-2021.                                                                  |                |                |                |
| ‡These tests were used in composite scores of global cognition (see Methods)             |                |                |                |

**Table S3. Statistical Model Covariates for Dementia and Cognitive Decline Analysis**

| Model        | Set                        | MAP (white)                                                                                                                                                                      | WHIMS (white women)                                                                                                                                                     | CHAP (white)                                                                                                                     | CHAP (black)                                                                                                                     |
|--------------|----------------------------|----------------------------------------------------------------------------------------------------------------------------------------------------------------------------------|-------------------------------------------------------------------------------------------------------------------------------------------------------------------------|----------------------------------------------------------------------------------------------------------------------------------|----------------------------------------------------------------------------------------------------------------------------------|
| <b>Basic</b> | <b>Basic</b>               | MIND score(T)<br>Age(C)<br>Sex(D)<br><br><br><br>Genotyping platform(D) <sup>3</sup>                                                                                             | MIND score(T)<br>Age(C)<br><br>Region (4 categories)<br>Randomization status (4 categories)<br><br>GWAS set (D) <sup>3</sup><br>10 principle components(C) <sup>3</sup> | MIND score(T)<br>Age(C)<br>Sex(D)<br><br><br><br>10 principle components(C) <sup>3</sup>                                         | MIND score(T)<br>Age(C)<br>Sex(D)<br><br><br><br>10 principle components(C) <sup>3</sup>                                         |
|              | Cognitive Reserve (CogRes) | <b>Basic+</b><br>Years of education(C)<br>Late-life cognitive activity(Q) <sup>4</sup><br>Global cognition score(C) <sup>2</sup><br>Income(5 categories) <sup>1</sup>            | <b>Basic+</b><br>Education (3 categories)<br><br>Global cognition score (C) <sup>2</sup><br>Income (6 categories)                                                       | <b>Basic+</b><br>Years of education(C)<br>Late-life cognitive activity(C)<br>Global cognition score(C) <sup>2</sup><br>Income(C) | <b>Basic+</b><br>Years of education(C)<br>Late-life cognitive activity(C)<br>Global cognition score(C) <sup>2</sup><br>Income(C) |
|              | Disease                    | <b>Basic+</b><br>History of hypertension(D) <sup>4</sup><br>History of diabetes(D) <sup>4</sup><br>History of heart disease(D) <sup>4</sup><br>History of stroke(D) <sup>4</sup> | <b>Basic+</b><br>History of hypertension(D)<br>History of diabetes(D)<br>History of heart disease(D)<br>History of stroke(D)                                            | <b>Basic+</b><br>History of hypertension(D)<br>History of diabetes(D)<br>History of heart disease(D)<br>History of stroke(D)     | <b>Basic+</b><br>History of hypertension(D)<br>History of diabetes(D)<br>History of heart disease(D)<br>History of stroke(D)     |
|              | Lifestyle                  | <b>Basic+</b><br>Smoking(3 categories)<br>Calories(C)<br>CESD score(T) <sup>4</sup><br>Physical activity(Q) <sup>4</sup><br>BMI(5 categories) <sup>1,4</sup>                     | <b>Basic+</b><br>Smoking(3 categories)<br>Calories(C)<br>Depression score (T)<br>Physical activity(T)<br>BMI(3 categories)                                              | <b>Basic+</b><br>Smoking(3 categories)<br>Calories(C)<br>CESD score(C)<br>Physical activity(C)<br>BMI(5 categories) <sup>1</sup> | <b>Basic+</b><br>Smoking(3 categories)<br>Calories(C)<br>CESD score(C)<br>Physical activity(C)<br>BMI(5 categories) <sup>1</sup> |
| Full         | Full                       | All of the above                                                                                                                                                                 | All of the above                                                                                                                                                        | All of the above                                                                                                                 | All of the above                                                                                                                 |

(C) continuous, (D) dichotomous, (T) tertiles, (Q) quartiles,

<sup>1</sup>Includes a 'missing' category.

<sup>2</sup>Not included for analysis of cognitive decline.

<sup>3</sup>Used in genetic analysis only. For MAP, the genetic sample is of European-ancestry only. For WHIMS, genetic analyses are restricted to genetically-inferred European ancestry (89% of WHIMS). For CHAP, genetic analyses are performed separately for genetically inferred European and African American.

<sup>4</sup>Time-varying covariates for analysis of cognitive decline.

**Table S4. Analytical Samples**

|                                                                                                                             | MAP  | WHIMS | CHAP-White | CHAP-Black |
|-----------------------------------------------------------------------------------------------------------------------------|------|-------|------------|------------|
| <b>Initial n</b><br>Non-missing baseline outcome data (dementia/cognition score), MIND score and model 1 covariates         | 1054 | 6851  | 2542       | 4314       |
| Exclude participants with missing genetic data                                                                              | -224 | -1417 | -1565      | -2651      |
| Exclude participants with <1 follow-up assessment (i.e. all participants require at least a baseline visit and 1 follow-up) | -63  | -126  | -31        | -160       |
| Exclude prevalent (baseline) cases of dementia                                                                              | -42  | 0     | 0          | 0          |
| <b>Final n</b>                                                                                                              | 725  | 5308  | 946        | 1503       |

**Table S5. Late-Onset Alzheimer's Disease Risk Loci<sup>1-10</sup>**

| Closest Gene      | Chr:Pos      | SNP_EA                         | OA | EAF  |      | Effect OR* | Effect $\beta$ | GS <sub>AD</sub> | GS <sub>AD-I</sub> | GS <sub>AD-C</sub> |
|-------------------|--------------|--------------------------------|----|------|------|------------|----------------|------------------|--------------------|--------------------|
|                   |              |                                |    | EUR  | AFR  |            |                |                  |                    |                    |
| <i>CRI</i>        | 1:207692049  | rs6656401 A                    | G  | 0.20 | 0.01 | 1.18       | 0.16           | x                | x                  |                    |
| <i>BIN1</i>       | 2:127892810  | rs6733839 T                    | C  | 0.41 | 0.42 | 1.22       | 0.19           | x                |                    |                    |
| <i>INPP5D</i>     | 2:234068476  | rs35349669 T                   | C  | 0.48 | 0.10 | 1.08       | 0.07           | x                | x                  |                    |
| <i>CLNK</i>       | 4:11026028   | rs6448453 A                    | G  | 0.25 | 0.10 | 1.09       | 0.09           | x                | x                  |                    |
| <i>MEF2C</i>      | 5:88223420   | rs190982_A                     | G  | 0.63 | 0.92 | 1.08       | 0.08           | x                | x                  |                    |
| <i>HLA-DRB1/5</i> | 6:32578530   | rs9271192_C<br>(rs111418223 C) | A  | 0.27 | 0.23 | 1.11       | 0.10           | x                | x                  |                    |
| <i>CD2AP</i>      | 6:47487762   | rs10948363 G                   | A  | 0.27 | 0.27 | 1.1        | 0.10           | x                |                    |                    |
| <i>NME8</i>       | 7:37841534   | rs2718058 A                    | G  | 0.64 | 0.49 | 1.08       | 0.07           | x                |                    |                    |
| <i>ZCWPW1</i>     | 7:100004446  | rs1476679 T                    | C  | 0.69 | 0.98 | 1.1        | 0.08           | x                |                    |                    |
| <i>EPHA1</i>      | 7:143110762  | rs11771145 G                   | A  | 0.63 | 0.43 | 1.11       | 0.10           | x                | x                  |                    |
| <i>PTK2B</i>      | 8:27195121   | rs28834970 C                   | T  | 0.35 | 0.22 | 1.1        | 0.10           | x                |                    |                    |
| <i>CLU</i>        | 8:27467686   | rs9331896 T                    | C  | 0.60 | 0.38 | 1.16       | 0.15           | x                | x                  | x                  |
| <i>ECHDC3</i>     | 10:11720308  | rs7920721 G                    | A  | 0.36 | 0.11 | 1.08       | 0.08           | x                |                    |                    |
| <i>CELF1</i>      | 11:47557871  | rs10838725 C                   | T  | 0.27 | 0.02 | 1.08       | 0.08           | x                |                    |                    |
| <i>MS4A6A</i>     | 11:59923508  | rs983392 A                     | G  | 0.58 | 0.97 | 1.16       | 0.11           | x                | x                  |                    |
| <i>PICALM</i>     | 11:85867875  | rs10792832 G                   | A  | 0.62 | 0.91 | 1.34       | 0.13           | x                |                    |                    |
| <i>SORL1</i>      | 11:121435587 | rs11218343 T                   | C  | 0.96 | 0.10 | 1.3        | 0.27           | x                |                    | x                  |
| <i>FERMT2</i>     | 14:53400629  | rs17125944 C                   | T  | 0.08 | 0.06 | 1.14       | 0.12           | x                |                    |                    |
| <i>SLC24A4</i>    | 14:92926952  | rs10498633 G                   | T  | 0.79 | 0.88 | 1.01       | 0.10           | x                |                    | x                  |
| <i>ADAM10</i>     | 15:59045774  | rs593742 A                     | G  | 0.64 | 0.21 | 1.04       | 0.08           | x                |                    |                    |
| <i>IQCK</i>       | 16:19808163  | rs7185636 T                    | C  | 0.85 | 0.09 | 1.09       | 0.09           | x                |                    |                    |
| <i>ABCA7</i>      | 19:1063443   | rs4147929 A                    | G  | 0.17 | 0.02 | 1.22       | 0.13           | x                |                    | x                  |
| <i>CD33</i>       | 19:51727962  | rs3865444 C                    | A  | 0.69 | 0.93 | 1.10       | 0.10           | x                | x                  |                    |
| <i>CASS4</i>      | 20:55018260  | rs7274581 T                    | C  | 0.92 | 0.73 | 1.14       | 0.14           | x                |                    |                    |
| <i>ADAMTS1</i>    | 21:28156856  | rs2830500 C                    | A  | 0.70 | 0.91 | 1.07       | 0.07           | x                | x                  |                    |

AFR: African ancestry, EA: effect allele, EAF: EA frequency, EUR: European ancestry, GS<sub>AD</sub>: AD predisposition genetic score (I: immune response; C: cholesterol metabolism), OA: other allele; OR: odds ratio. \*As reported by the two largest GWAS to date<sup>1,3</sup>.

**Table S6. GS and Risk of Alzheimer's Dementia<sup>1</sup>**

| Genetic exposure   | MAP               |        | CHAP (White)      |      | CHAP (Black)      |      |
|--------------------|-------------------|--------|-------------------|------|-------------------|------|
|                    | HR (95% CI)       | P      | OR (95% CI)       | P    | OR (95% CI)       | P    |
| GS <sub>AD</sub>   |                   |        |                   |      |                   |      |
| T1                 | Ref.              |        | Ref.              |      | Ref.              |      |
| T2                 | 1.04 (0.73, 1.47) | 0.85   | 1.48 (0.60, 3.66) | 0.39 | 2.38 (0.79, 7.18) | 0.12 |
| T3                 | 1.72 (1.24, 2.39) | 0.001  | 1.51 (0.52, 4.40) | 0.45 | 0.72 (0.26, 2.04) | 0.54 |
| Trend              | 1.10 (1.05, 1.15) | 0.0001 | 1.10 (0.92, 1.32) | 0.31 | 1.06 (0.94, 1.21) | 0.34 |
| GS <sub>AD-I</sub> |                   |        |                   |      |                   |      |
| T1                 | Ref.              |        | Ref.              |      | Ref.              |      |
| T2                 | 1.34 (0.95, 1.89) | 0.09   | 1.15 (0.49, 2.72) | 0.74 | 1.84 (0.75, 4.50) | 0.18 |
| T3                 | 1.37 (0.98, 1.91) | 0.06   | 2.01 (0.77, 5.26) | 0.15 | 0.63 (0.23, 1.71) | 0.36 |
| Trend              | 1.06 (0.99, 1.13) | 0.10   | 1.18 (0.97, 1.43) | 0.10 | 0.87 (0.72, 1.05) | 0.15 |
| GS <sub>AD-C</sub> |                   |        |                   |      |                   |      |
| T1                 | Ref.              |        | Ref.              |      | Ref.              |      |
| T2                 | 0.92 (0.66, 1.30) | 0.65   | 0.99 (0.38, 2.54) | 0.97 | 1.26 (0.39, 4.06) | 0.70 |
| T3                 | 1.13 (0.82, 1.55) | 0.45   | 2.27 (0.86, 5.97) | 0.10 | 0.55 (0.20, 1.54) | 0.25 |
| Trend              | 1.08 (0.94, 1.23) | 0.29   | 1.64 (0.88, 3.03) | 0.12 | 1.06 (0.81, 1.39) | 0.69 |
| APOE               |                   |        |                   |      |                   |      |
| Non-carrier        | Ref.              |        | Ref.              |      | Ref.              |      |
| Carrier            | 2.01 (1.49, 2.71) | <.0001 | 1.90 (0.76, 4.72) | 0.17 | 1.13 (0.42, 3.05) | 0.81 |

<sup>1</sup>Results from Cox proportional hazard regression models adjusted for age, sex and genotype platform (MAP) or PCs (CHAP). T1, T2, T3 indicate tertile 1, tertile 2 and tertile 3 GS scores, respectively.

**Table S7. GS and Cognitive Decline<sup>1</sup>**

| GS                 | MAP                     |        | CHAP-White             |      | CHAP-Black             |      |
|--------------------|-------------------------|--------|------------------------|------|------------------------|------|
|                    | β (95% CI)              | P      | β (95% CI)             | P    | β (95% CI)             | P    |
| GS <sub>AD</sub>   |                         |        |                        |      |                        |      |
| T1                 | Ref.                    |        | Ref.                   |      | Ref.                   |      |
| T2                 | -0.01 (-0.03, 0.006)    | 0.16   | 0.003 (-0.01,0.01)     | 0.64 | -0.004 (-0.01,0.01)    | 0.44 |
| T3                 | -0.04 (-0.06, -0.02)    | <.0001 | 0.002 (-0.01,0.01)     | 0.67 | -0.002 (-0.01,0.01)    | 0.65 |
| Trend              | -0.006 (-0.009, -0.004) | <.0001 | -0.0002 (-0.002,0.001) | 0.81 | -0.0003 (-0.002,0.001) | 0.72 |
| GS <sub>AD-I</sub> |                         |        |                        |      |                        |      |
| T1                 | Ref.                    |        | Ref.                   |      | Ref.                   |      |
| T2                 | -0.03 (-0.05, -0.007)   | 0.007  | -0.0001 (-0.01,0.01)   | 0.98 | -0.003 (-0.01,0.01)    | 0.58 |
| T3                 | -0.03 (-0.05, -0.01)    | 0.003  | -0.0009 (-0.01,0.01)   | 0.88 | 0.002 (-0.007,0.012)   | 0.64 |
| Trend              | -0.005 (-0.009, -0.001) | 0.01   | -0.0006 (-0.003,0.001) | 0.55 | 0.0005 (-0.002,0.003)  | 0.68 |
| GS <sub>AD-C</sub> |                         |        |                        |      |                        |      |
| T1                 | Ref.                    |        | Ref.                   |      | Ref.                   |      |
| T2                 | 0.008 (-0.01, 0.03)     | 0.46   | -0.006 (-0.02,0.005)   | 0.27 | -0.002 (-0.01,0.01)    | 0.67 |
| T3                 | -0.007 (-0.03, 0.01)    | 0.52   | -0.005 (-0.02,0.006)   | 0.39 | 0.001 (-0.01,0.01)     | 0.88 |
| Trend              | -0.005 (-0.01, 0.004)   | 0.28   | -0.003 (-0.01,0.002)   | 0.27 | 0.001 (-0.003,0.005)   | 0.53 |

<sup>1</sup>Results from mixed linear models adjusted for age, sex and genotyping platform (MAP) or PCs (CHAP). Coefficients reflect change in cognitive function; a negative (positive) value corresponds to a decline (improvement) in cognitive function. T1, T2, T3 indicate tertile 1, tertile 2 and tertile 3 GS scores, respectively.

## References

1. Jansen I, Savage J, Watanabe K, et al. Genome-wide meta-analysis identifies new loci and functional pathways influencing Alzheimer's disease risk. *Nature genetics* 2019.
2. Hollingworth P, Harold D, Sims R, et al. Common variants at ABCA7, MS4A6A/MS4A4E, EPHA1, CD33 and CD2AP are associated with Alzheimer's disease. *Nat Genet* 2011;43:429-435.
3. Lambert JC, Ibrahim-Verbaas CA, Harold D, et al. Meta-analysis of 74,046 individuals identifies 11 new susceptibility loci for Alzheimer's disease. *Nat Genet* 2013;45:1452-1458.
4. Naj AC, Jun G, Beecham GW, et al. Common variants at MS4A4/MS4A6E, CD2AP, CD33 and EPHA1 are associated with late-onset Alzheimer's disease. *Nat Genet* 2011;43:436-441.
5. Herold C, Hooli BV, Mullin K, et al. Family-based association analyses of imputed genotypes reveal genome-wide significant association of Alzheimer's disease with OSBPL6, PTPRG, and PDCL3. *Molecular psychiatry* 2016;21:1608-1612.
6. Lambert JC, Heath S, Even G, et al. Genome-wide association study identifies variants at CLU and CR1 associated with Alzheimer's disease. *Nat Genet* 2009;41:1094-1099.
7. Jun G, Ibrahim-Verbaas CA, Vronskaya M, et al. A novel Alzheimer disease locus located near the gene encoding tau protein. *Molecular psychiatry* 2016;21:108-117.
8. Jun GR, Chung J, Mez J, et al. Transethnic genome-wide scan identifies novel Alzheimer's disease loci. *Alzheimers Dement* 2017;13:727-738.
9. Jiang Q, Jin S, Jiang Y, et al. Alzheimer's Disease Variants with the Genome-Wide Significance are Significantly Enriched in Immune Pathways and Active in Immune Cells. *Molecular neurobiology* 2017;54:594-600.
10. Kunkle BW, Grenier-Boley B, Sims R, et al. Genetic meta-analysis of diagnosed Alzheimer's disease identifies new risk loci and implicates A $\beta$ , tau, immunity and lipid processing. *Nature genetics* 2019;51:414-430.
